# Supplementary material
Source: PubMed Central journal article supplement (PMC6588732)
Supplement: mmc1.pdf [file mmc1.pdf]

**Biophysical Journal, Volume 116**

**Supplemental Information**

**Protein Glycation by Glyoxal Promotes Amyloid Formation by Islet  
Amyloid Polypeptide**

**Yi-Hsuan Hsu, Yun-Wen Chen, Meng-Hsin Wu, and Ling-Hsien Tu**

# Supporting Information for

## Protein glycation by glyoxal promotes amyloid formation by islet amyloid polypeptide

Yi-Hsuan Hsu<sup>†</sup>, Yun-Wen Chen<sup>‡</sup>, Meng-Hsien Wu<sup>†</sup>, and Ling-Hsien Tu<sup>†\*</sup>

<sup>†</sup>Department of Chemistry, National Taiwan Normal University, Taipei 116, Taiwan

<sup>‡</sup>Department of Pharmacology, College of Medicine, National Cheng Kung University, Tainan 701, Taiwan.

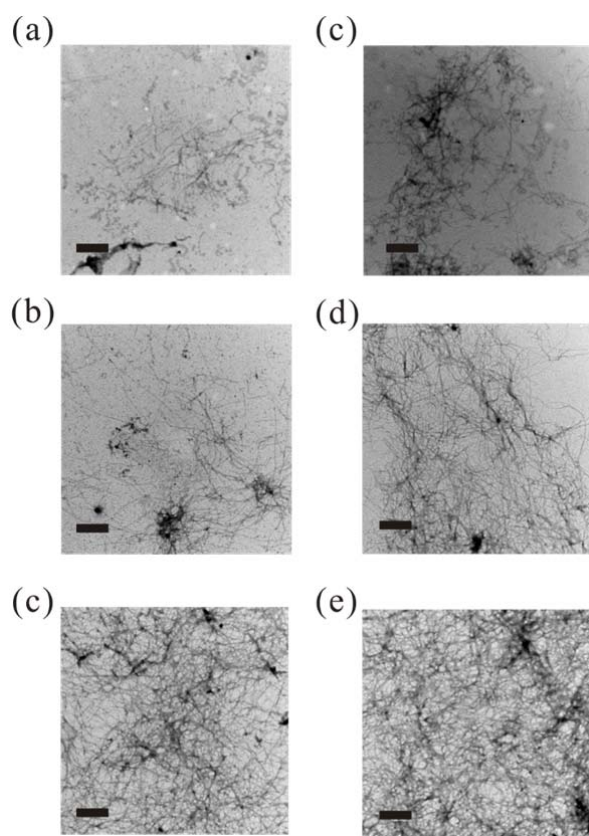

**Figure S1:** (a-c) TEM images for IAPP samples which were incubated for 24, 36, and 48 h. (c-d) TEM images for AGE-IAPP samples which were incubated for 24, 36, and 48 h. Protein samples were prepared in the same condition as CD experiments. The scale bar represents 500 nm.

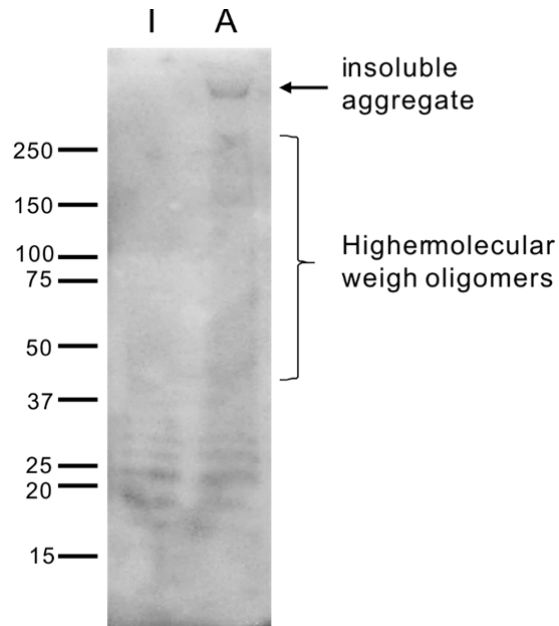

**Figure S2:** Oligomer distribution of unlinked IAPP and AGE-IAPP revealed by 4-20% gradient Tris-glycine gel and probed by IAPP antibody R10/99 after 2 h incubation. Protein samples were prepared at 32  $\mu$ M in pH 7.4, 10 mM Tris buffer at 25  $^{\circ}$ C. I represents IAPP and A represents AGE-IAPP.

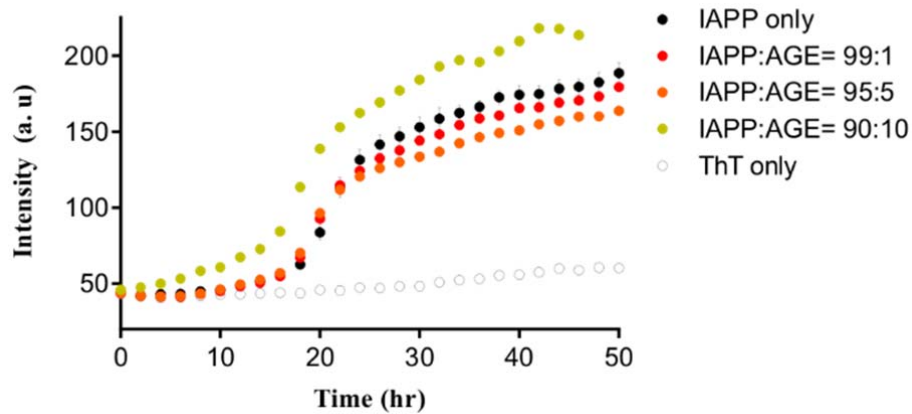

**Figure S3.** ThT fluorescence kinetics were shown for IAPP (black), IAPP and AGE-IAPP in a ratio of 99: 1 (red), 95: 5 (orange), and 90: 10 (dark yellow). The total peptide concentration was fixed at 32  $\mu$ M for each condition. The kinetic experiments were performed in duplicate.
